# Supplementary material
Source: Springer Nature journal article supplement (https://www.springermedizin.de/resource/supplementary/13643_2014_317_MOESM2_ESM.pdf/9681766)

# A Events in Per-Protocol Population

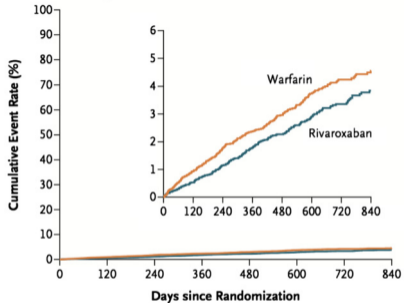

**No. at Risk**

|             |      |      |      |      |      |      |      |      |
|-------------|------|------|------|------|------|------|------|------|
| Rivaroxaban | 6958 | 6211 | 5786 | 5468 | 4406 | 3407 | 2472 | 1496 |
| Warfarin    | 7004 | 6327 | 5911 | 5542 | 4461 | 3478 | 2539 | 1538 |

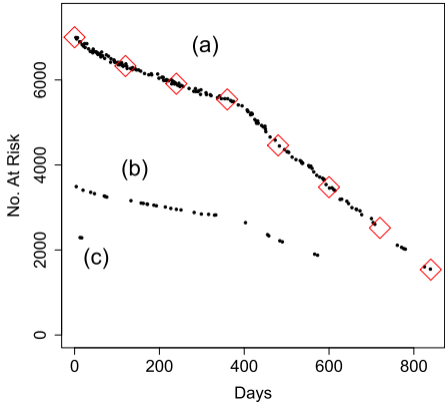

Supplement: MOESM2 [file 9681766]
